# Supplementary material for: Boosting the oxygen evolution reaction activity of a perovskite through introducing multi-element synergy and building an ordered structure
Source: Royal Society of Chemistry journal article supplement (doi:10.1039/c9ta01404g), 2019-01-01
Supplement: c9ta01404g1.pdf [file c9ta01404g1.pdf]

## Supporting Information

### **Boosting oxygen evolution reaction activity of perovskite through introducing multi-elements synergy and building ordered structure**

Hainan Sun<sup>a</sup>, Xiaomin Xu<sup>b</sup>, Zhiwei Hu<sup>c</sup>, Liu Hao Tjeng<sup>c</sup>, Jie Zhao<sup>a</sup>, Qin Zhang<sup>d</sup>, Hong-Ji Lin<sup>e</sup>, Chien-Te Chen<sup>e</sup>, Ting-Shan Chan<sup>e</sup>, Wei Zhou<sup>a,\*</sup>, and Zongping Shao<sup>a,b,\*</sup>

<sup>a</sup> State Key Laboratory of Materials-Oriented Chemical Engineering, College of Chemical Engineering, Nanjing Tech University, Nanjing 211816, P. R. China

<sup>b</sup> Department of Chemical Engineering, Curtin University, Perth, Western Australia 6845, Australia

<sup>c</sup> Max-Planck-Institute for Chemical Physical of Solids, Nöthnitzer Street 40, Dresden 01187, Germany

<sup>d</sup> School of Science, Shandong Jiaotong University, Jinan 250357, P. R. China

<sup>e</sup> National Synchrotron Radiation Research Center, 101 Hsin-Ann Road, Hsinchu 30076, Taiwan

\*Corresponding author: E-mail addresses

[zhouwei1982@njtech.edu.cn](mailto:zhouwei1982@njtech.edu.cn) (Wei Zhou)

[shaozp@njtech.edu.cn](mailto:shaozp@njtech.edu.cn) (Zongping Shao)

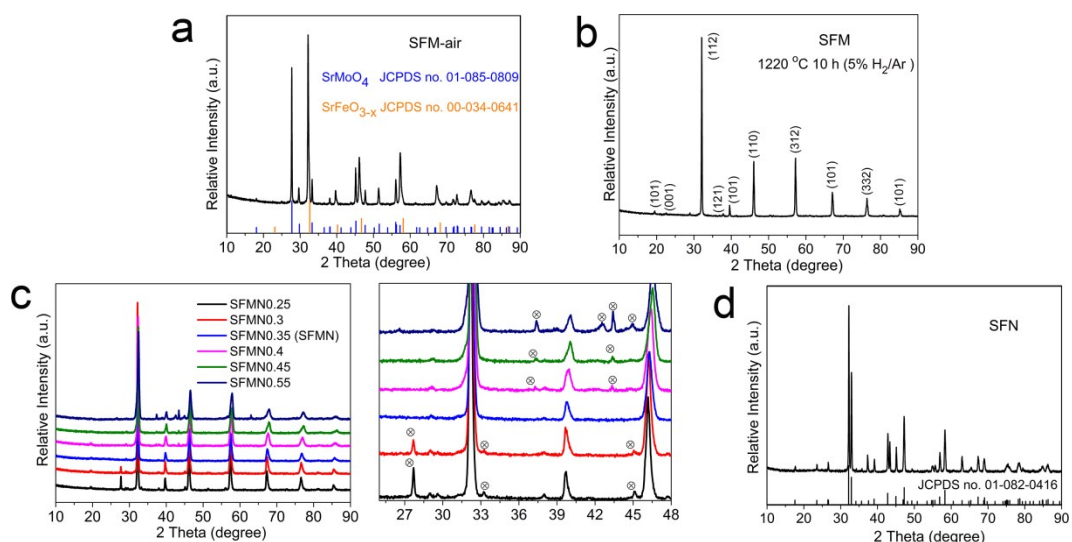

**Figure S1.** Room-temperature XRD patterns of (a) SFM-air, (b) SFM, (c) SFMN<sub>x</sub> ( $x = 0.25, 0.3, 0.35, 0.4, 0.45$  and  $0.55$ ) along with the magnified XRD spectrum of SFMN<sub>x</sub> between 2-theta of 26 and 48 °. The marks represent the SrMoO<sub>4</sub> phase formation. (d) SFN along with the corresponding reference spectra of Sr<sub>3</sub>Fe<sub>1.5</sub>Ni<sub>0.5</sub>O<sub>7-δ</sub>.

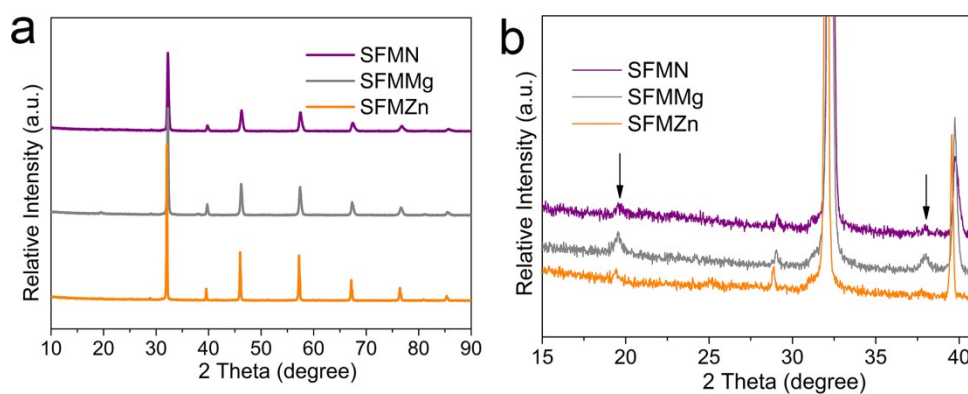

**Figure S2.** Room-temperature XRD patterns of (a) SFMN, SFMMg, and SFMZn. (b) Magnified XRD spectrum of SFMN, SFMMg, and SFMZn between 2-theta of 15 and 42 °. The arrows represent the characteristic peaks of the B-site cations ordered double perovskite structure.

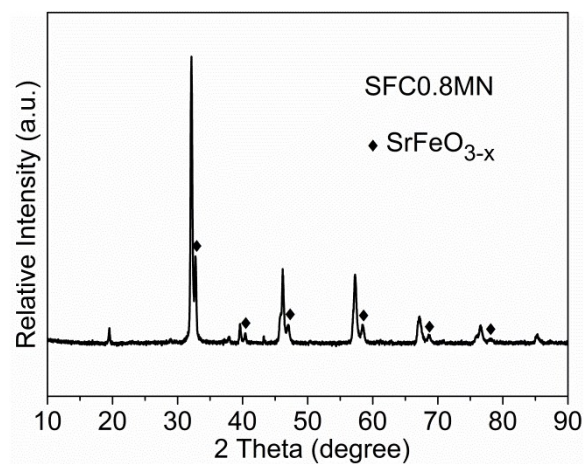

**Figure S3.** Room-temperature XRD patterns of SFC0.8MN.

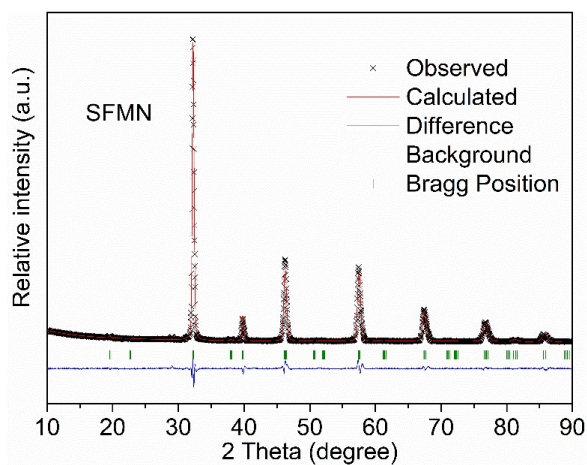

**Figure S4.** Rietveld refinement XRD patterns of SFMN.

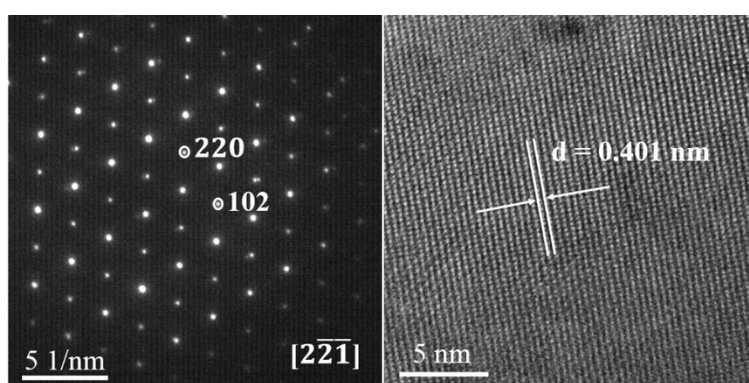

**Figure S5.** SAED pattern and the corresponding HR-TEM image for SFCMN.

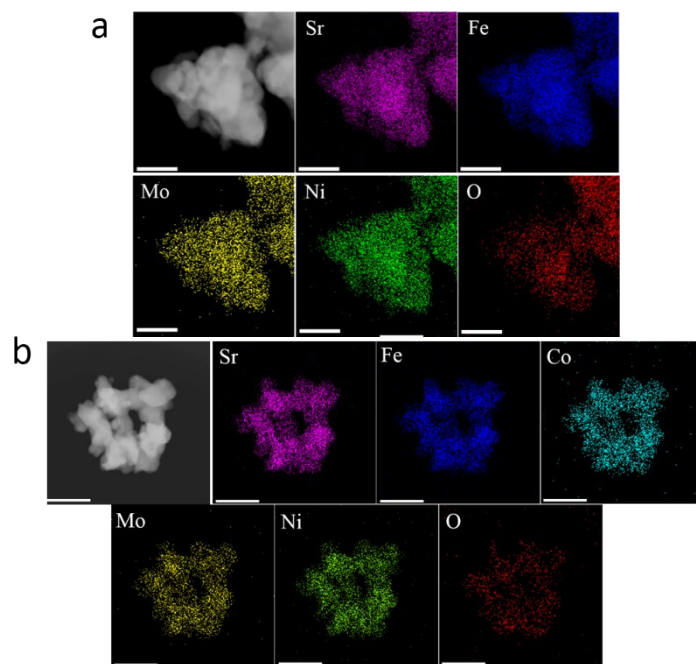

**Figure S6.** HAADF-STEM image and elemental mapping of Sr, Fe, (Co), Mo, Ni, and O. (a) SFMN, (b) SFCMN. The Scale bar is 250 nm.

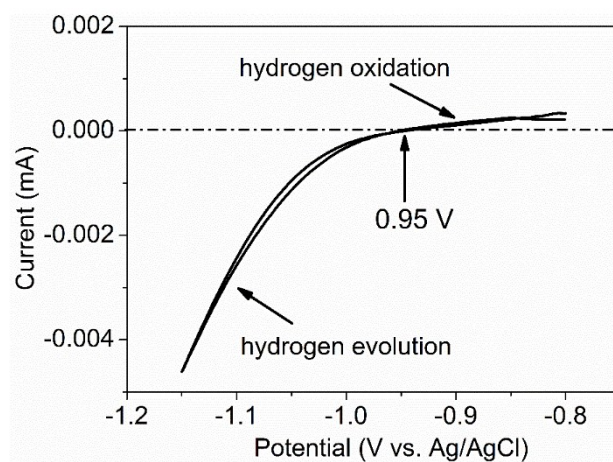

**Figure S7.** Potential calibration of the reference electrode (Ag/AgCl) in 0.1 M KOH solution. In summary, the potentials in the main text were calibrated by the following equation:  $V_{\text{RHE}} = V_{\text{Ag/AgCl}} + 0.95 \text{ V}$ .

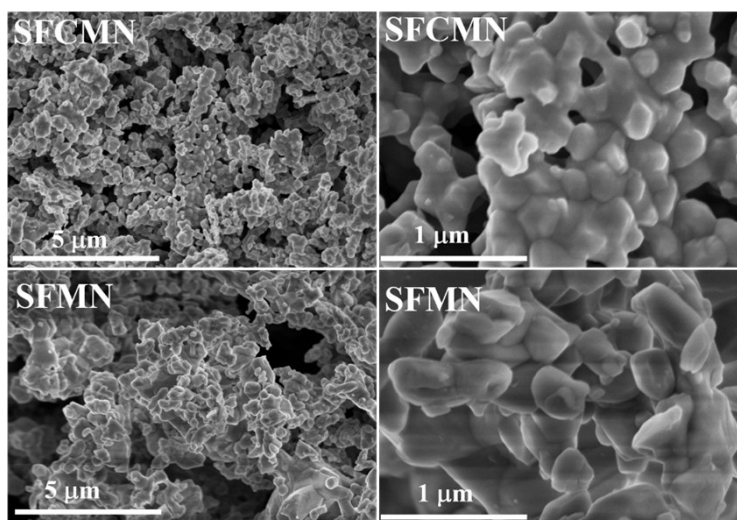

**Figure S8.** SEM images of the SFCMN and SFMN with different magnifications.

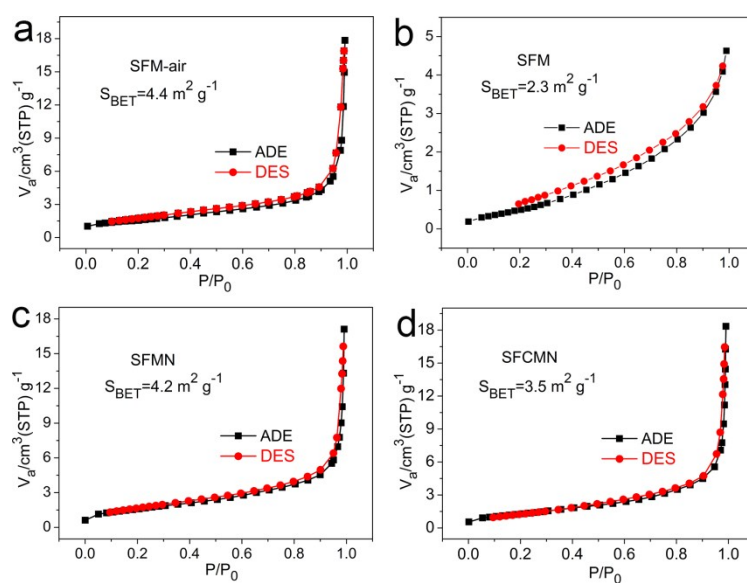

**Figure S9.** Nitrogen adsorption-desorption isotherm curves and their corresponding surface area of (a) SFM-air, (b) SFM, (c) SFMN and (d) SFCMN.

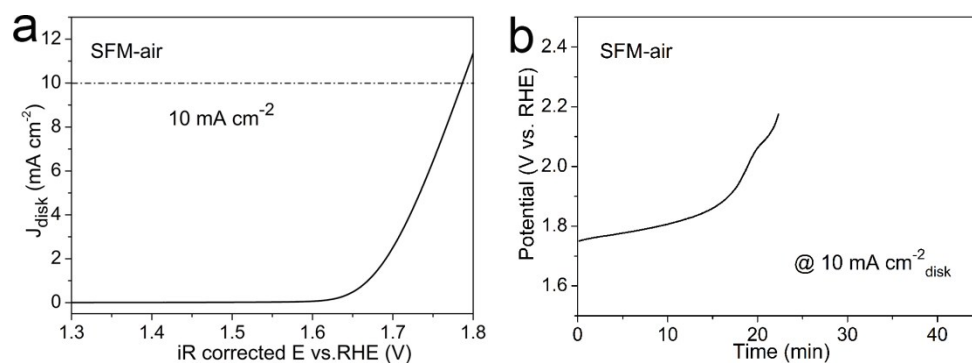

**Figure S10.** (a) OER activities collected from LSVs of SFM-air catalyst in O<sub>2</sub>-saturated 0.1 M KOH solution. (b) CP responses of the SFM-air catalyst on the RDE at a constant current density of 10 mA cm<sup>-2</sup><sub>disk</sub> in O<sub>2</sub>-saturated 0.1 M KOH solution.

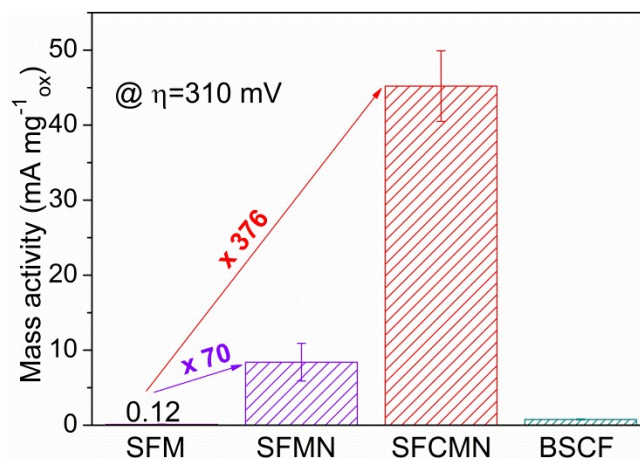

**Figure S11.** OER mass activity of the SFM, SFMN, SFCMN, and BSCF catalysts at overpotential of 310 mV. Error bars are the standard deviations of measurements done in triplicate.

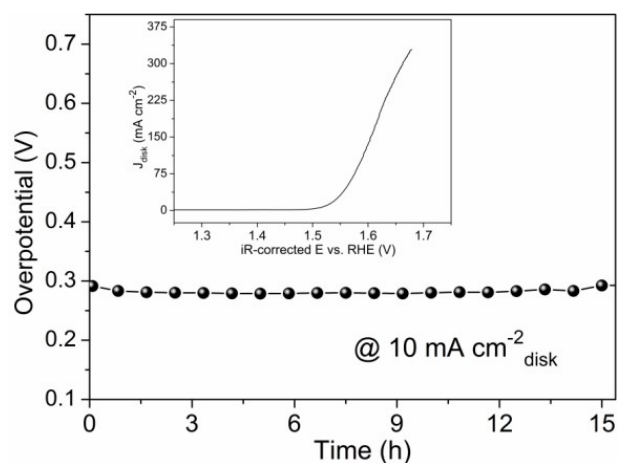

**Figure S12.** CP responses of SFCMN catalyst on the RDE at a constant current density of  $10 \text{ mA cm}^{-2}_{\text{disk}}$  in  $1.0 \text{ M KOH}$ . The OER activity collected from LSVs of SFCMN catalyst in  $\text{O}_2$ -saturated  $1.0 \text{ M KOH}$  solution is shown as an inset.

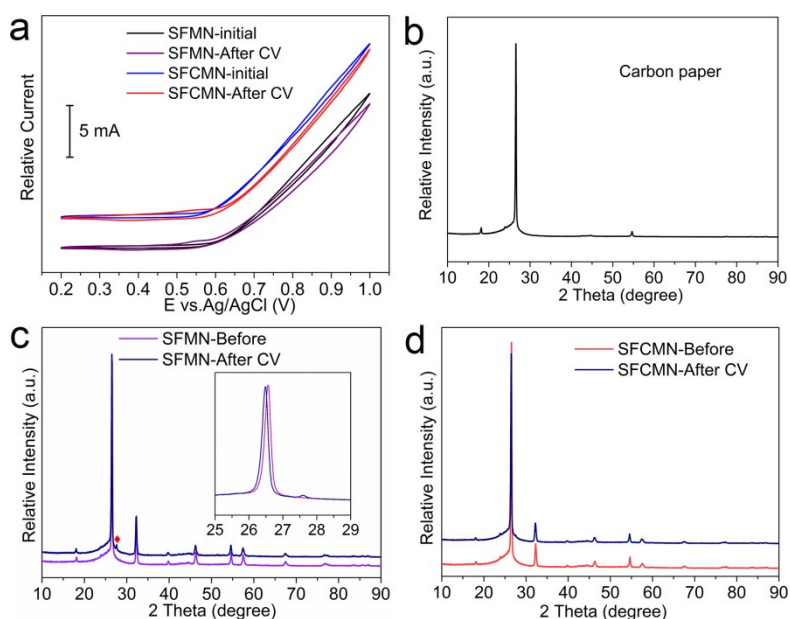

**Figure S13.** (a) Cyclic voltammetry (CV) curves of SFMN and SFCMN before and after the CV test. (b) XRD pattern of carbon paper (serving as substrate) for comparison. (c) XRD pattern of SFMN before and after the CV test supported on carbon paper. Inset is a magnified XRD pattern. (d) XRD pattern of SFCMN before and after the CV test supported on carbon paper.

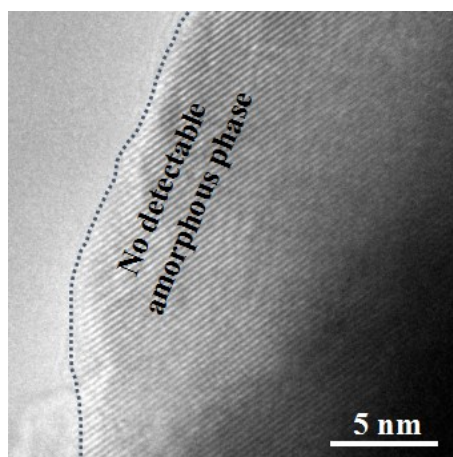

**Figure S14.** High resolution TEM image of SFCMN after CV test.

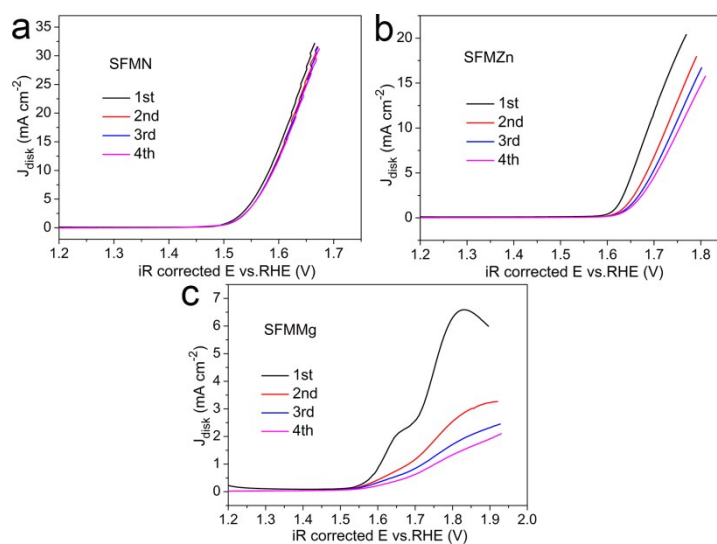

**Figure S15.** The first four LSV profiles for SFMN (a), SFMZn (b) and SFMMg (c), respectively. LSVs for the OER activities were tested in O<sub>2</sub>-saturated 0.1 M KOH solution at a scan rate of 1600 rpm.



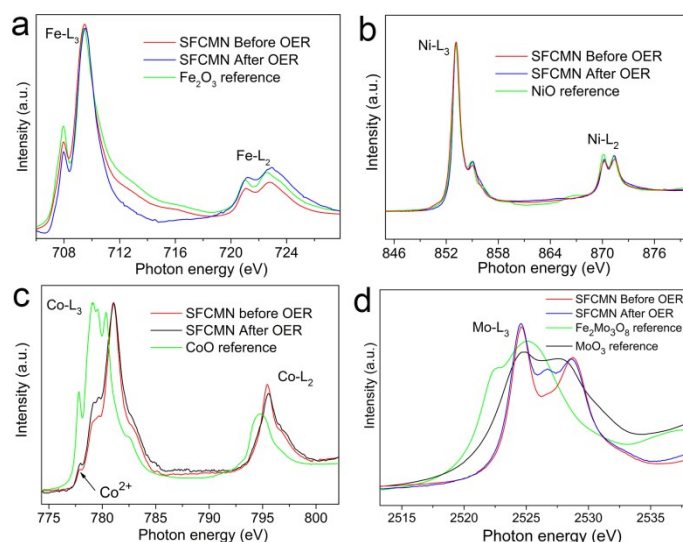

**Figure S16.** The XAS spectra of SFCMN before and after OER at (a) the Fe  $L_{2,3}$  edges; (b) the Ni  $L_{2,3}$  edges; (c) the Co  $L_{2,3}$  edges; (d) the Mo  $L_3$  edge. The XAS spectra of corresponding references are also shown for comparison.

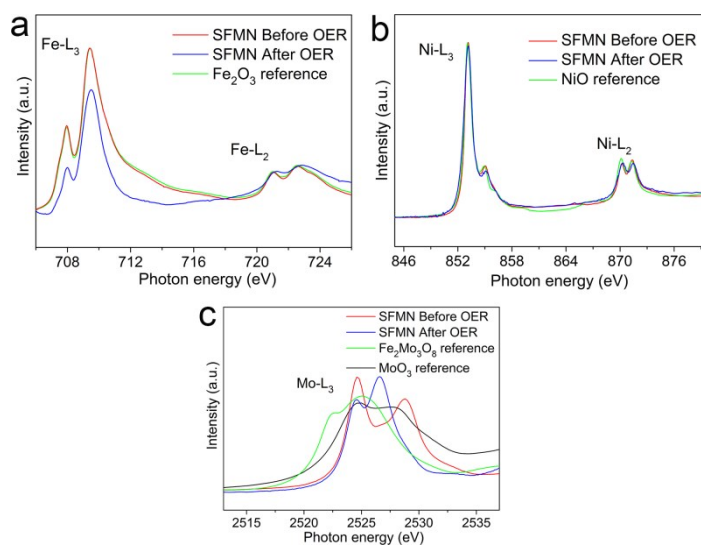

**Figure S17.** The XAS spectra of SFMN before and after OER at (a) the Fe  $L_{2,3}$  edges; (b) the Ni  $L_{2,3}$  edges; (c) the Mo  $L_3$  edge. The XAS spectra of corresponding references are also shown for comparison.

The  $\text{Fe}^{3+}$ ,  $\text{Ni}^{2+}$ , and  $\text{Mo}^{5+}/\text{Mo}^{6+}$  states in SFMN have been confirmed by soft XAS, and Sr in the A-site is divalent. In addition, the valence state of Mo ion is very close to 6+. Then, according to the charge balance ( $2 \times 2(\text{Sr}^{2+}) + 1 \times 3(\text{Fe}^{3+}) + 0.65 \times 6(\text{Mo}^{6+}) + 0.35 \times 2(\text{Ni}^{2+}) = 2 \times (6-\delta)(\text{O}^{2-})$ ), we obtain

$\delta \approx 0.20$  in  $\text{Sr}_2\text{FeMo}_{0.65}\text{Ni}_{0.35}\text{O}_{6-\delta}$ . Besides, Co ion in  $\text{Sr}_2\text{Fe}_{0.8}\text{Co}_{0.2}\text{Mo}_{0.65}\text{Ni}_{0.35}\text{O}_{6-\delta}$  is mixed valence of  $\text{Co}^{2+}$  and  $\text{Co}^{3+}$  and Co doping has a negligible effect on the state of Fe, Ni and Mo compared to  $\text{Sr}_2\text{FeMo}_{0.65}\text{Ni}_{0.35}\text{O}_{6-\delta}$ . Therefore, the partial substitution of Fe ( $\text{Fe}^{3+}$ ) by Co ( $\text{Co}^{2+}$  and  $\text{Co}^{3+}$ ) in SFCMN can enhance the formation of oxygen vacancies. According to the charge balance ( $2 \times 2(\text{Sr}^{2+}) + 0.8 \times 3(\text{Fe}^{3+}) + 0.2 \times 2.8(\text{Co}^{2+}/\text{Co}^{3+}) + 0.65 \times 6(\text{Mo}^{6+}) + 0.35 \times 2(\text{Ni}^{2+}) = 2 \times (6-\delta)(\text{O}^{2-})$ ), we obtain  $\delta \approx 0.22$  in  $\text{Sr}_2\text{Fe}_{0.8}\text{Co}_{0.2}\text{Mo}_{0.65}\text{Ni}_{0.35}\text{O}_{6-\delta}$ .

**Table S1.** As-synthesized catalysts with their nominal compositions, calcination condition, and abbreviations, respectively.

| Catalysts                                                                                      | Calcination Condition | Atmosphere                | Abbreviation |
|------------------------------------------------------------------------------------------------|-----------------------|---------------------------|--------------|
| $\text{Sr}_2\text{FeMoO}_{6-\delta}$                                                           | 1100 °C/10 h          | Air                       | SFM-air      |
| $\text{Sr}_2\text{FeMoO}_{6-\delta}$                                                           | 1220 °C/10 h          | 5% $\text{H}_2/\text{Ar}$ | SFM          |
| $\text{Sr}_2\text{FeNiO}_{6-\delta}$                                                           | 1000 °C/10 h          | Air                       | SFN          |
| $\text{Sr}_2\text{FeMo}_{0.75}\text{Ni}_{0.25}\text{O}_{6-\delta}$                             | 1100 °C/10 h          | Air                       | SFMN0.25     |
| $\text{Sr}_2\text{FeMo}_{0.7}\text{Ni}_{0.3}\text{O}_{6-\delta}$                               | 1100 °C/10 h          | Air                       | SFMN0.3      |
| $\text{Sr}_2\text{FeMo}_{0.65}\text{Ni}_{0.35}\text{O}_{6-\delta}$                             | 1100 °C/10 h          | Air                       | SFMN         |
| $\text{Sr}_2\text{FeMo}_{0.6}\text{Ni}_{0.4}\text{O}_{6-\delta}$                               | 1100 °C/10 h          | Air                       | SFMN0.4      |
| $\text{Sr}_2\text{FeMo}_{0.55}\text{Ni}_{0.45}\text{O}_{6-\delta}$                             | 1100 °C/10 h          | Air                       | SFMN0.45     |
| $\text{Sr}_2\text{FeMo}_{0.45}\text{Ni}_{0.55}\text{O}_{6-\delta}$                             | 1100 °C/10 h          | Air                       | SFMN0.55     |
| $\text{Sr}_2\text{FeMo}_{2/3}\text{Mg}_{1/3}\text{O}_{6-\delta}$                               | 1200 °C/10 h          | Air                       | SFMMg        |
| $\text{Sr}_2\text{FeMo}_{0.63}\text{Zn}_{0.37}\text{O}_{6-\delta}$                             | 1150 °C/10 h          | Air                       | SFMZn        |
| $\text{Sr}_2\text{Fe}_{0.8}\text{Co}_{0.2}\text{Mo}_{0.65}\text{Ni}_{0.35}\text{O}_{6-\delta}$ | 1100 °C/10 h          | Air                       | SFCMN        |
| $\text{Sr}_2\text{Fe}_{0.2}\text{Co}_{0.8}\text{Mo}_{0.65}\text{Ni}_{0.35}\text{O}_{6-\delta}$ | 1100 °C/10 h          | Air                       | SFC0.8MN     |
| $\text{Ba}_{0.5}\text{Sr}_{0.5}\text{Co}_{0.8}\text{Fe}_{0.2}\text{O}_{3-\delta}$              | 1000 °C/5 h           | Air                       | BSCF         |

**Table S2.** Summary of structure parameters for the as-synthesized SFMN from Rietveld refinement (space group  $I4/m$ ) at room temperature.

|                             |                       |
|-----------------------------|-----------------------|
| $a = b/c$ (Å)               | 5.56126(5)/7.82912(6) |
| $V$ (Å <sup>3</sup> )       | 242.135(9)            |
| $\chi^2/R_{wp}(\%)/R_p(\%)$ | 4.715/4.33/3.11       |

**Table S3.** Crystallographic details of SFMN obtained from neutron powder diffraction data.

| Space group: $I4m$                                                                                           |      |       |      |       |                                    |           |
|--------------------------------------------------------------------------------------------------------------|------|-------|------|-------|------------------------------------|-----------|
| Lattice parameter $a = b = 5.5720(7)\text{Å}$ , $c = 7.8386(8)\text{Å}$ , $\text{vol} = 243.37(5)\text{Å}^3$ |      |       |      |       |                                    |           |
| Atom                                                                                                         | Site | x     | y    | z     | $U_{\text{iso}}$ (Å <sup>2</sup> ) | Occupancy |
| Sr                                                                                                           | 4    | 0     | 0.5  | 0.25  | 0.0108(4)                          | 1         |
| Fe                                                                                                           | 2    | 0     | 0    | 0     | 0.0001(1)                          | 1         |
| Mo                                                                                                           | 2    | 0     | 0    | 0.5   | 0.0100(0)                          | 0.668     |
| Ni                                                                                                           | 2    | 0     | 0    | 0.5   | 0.0100(0)                          | 0.332     |
| O1                                                                                                           | 4    | 0     | 0    | 0.254 | 0.0158(5)                          | 1         |
| O2                                                                                                           | 8    | 0.233 | 0.27 | 0     | 0.0102(5)                          | 1         |
| wR = 4.99 %                                                                                                  |      |       |      |       |                                    |           |

**Table S4.** Metal elements compositions by ICP-MS of the SFMN and SFCMN powders

| ICP-MS analysis                                                                                            |                                                           |       |       |       |       |                                                                                                               |
|------------------------------------------------------------------------------------------------------------|-----------------------------------------------------------|-------|-------|-------|-------|---------------------------------------------------------------------------------------------------------------|
| Nominal composition                                                                                        | The concentrations of metal ions<br>(mg L <sup>-1</sup> ) |       |       |       |       | ICP-MS<br>composition                                                                                         |
|                                                                                                            | Sr                                                        | Fe    | Co    | Mo    | Ni    |                                                                                                               |
| Sr <sub>2</sub> FeMo <sub>0.65</sub> Ni <sub>0.35</sub> O <sub>6-δ</sub>                                   | 4.071                                                     | 1.164 | /     | 1.333 | 0.409 | Sr <sub>2.08</sub> FeMo <sub>0.67</sub> Ni <sub>0.34</sub> O <sub>6-δ</sub>                                   |
| Sr <sub>2</sub> Fe <sub>0.8</sub> Co <sub>0.2</sub> Mo <sub>0.65</sub> Ni <sub>0.35</sub> O <sub>6-δ</sub> | 3.373                                                     | 0.705 | 0.185 | 0.959 | 0.314 | Sr <sub>2.07</sub> Fe <sub>0.8</sub> Co <sub>0.2</sub> Mo <sub>0.64</sub> Ni <sub>0.34</sub> O <sub>6-δ</sub> |

**Table S5.** Comparison of OER catalytic activity data with various recently reported catalysts.

| Catalysts                                                                                                  | Onset<br>overpotential<br>(mV) | Overpotential<br>(mV) @<br>10 mA cm <sup>-2</sup> | Tafel<br>slope<br>(mV dec <sup>-1</sup> ) | Ref.                                      |
|------------------------------------------------------------------------------------------------------------|--------------------------------|---------------------------------------------------|-------------------------------------------|-------------------------------------------|
| IrO <sub>2</sub>                                                                                           | 240                            | 450                                               | 83                                        | This work                                 |
| RuO <sub>2</sub>                                                                                           | 240                            | 390                                               | 78                                        | ACS Catal.<br>2018, 8, 364                |
| Sr <sub>2</sub> FeMoO <sub>6-δ</sub>                                                                       | 368                            | 450                                               | 53                                        | This work                                 |
| Sr <sub>2</sub> FeMo <sub>0.65</sub> Ni <sub>0.35</sub> O <sub>6-δ</sub>                                   | 252                            | 340                                               | 61                                        | This work                                 |
| Sr <sub>2</sub> Fe <sub>0.8</sub> Co <sub>0.2</sub> Mo <sub>0.65</sub> Ni <sub>0.35</sub> O <sub>6-δ</sub> | 190                            | 310                                               | 56                                        | This work                                 |
| PrBaCo <sub>2</sub> O <sub>5+δ</sub>                                                                       | 315                            | 517                                               | 145                                       | Chem. Eur. J.<br>2017, 23, 5722           |
| PrBa <sub>0.85</sub> Ca <sub>0.15</sub> MnFeO <sub>5+δ</sub>                                               | 290                            | 400                                               | 88                                        | Chem. Mater.,<br>2017, 29, 6228           |
| PrBa <sub>0.5</sub> Sr <sub>0.5</sub> Co <sub>1.5</sub> Fe <sub>0.5</sub> O <sub>5+δ-III</sub>             | 260                            | 358                                               | 52                                        | Nat. Commun.<br>2017, 8, 14586            |
| Ba <sub>0.5</sub> Sr <sub>0.5</sub> Co <sub>0.8</sub> Fe <sub>0.2</sub> O <sub>3-δ</sub>                   | 310                            | 510                                               | 100                                       | Electrochimica.<br>Acta, 2016, 219<br>553 |
| BaCo <sub>0.7</sub> Fe <sub>0.2</sub> Sn <sub>0.1</sub> O <sub>3-δ</sub>                                   | 300                            | 450                                               | 69                                        | Adv. Sci.<br>2015, 1500187                |

---

|                                                                                                          |                    |     |     |                                                  |
|----------------------------------------------------------------------------------------------------------|--------------------|-----|-----|--------------------------------------------------|
| $\text{Ba}_2\text{Bi}_{0.1}\text{Sc}_{0.2}\text{Co}_{1.7}\text{O}_{6-\delta}$                            | 310                | 492 | 102 | Chem. Eur. J.<br>2017, 23, 5722                  |
| $\text{La}_{0.3}(\text{Ba}_{0.5}\text{Sr}_{0.5})_{0.7}\text{Co}_{0.8}\text{Fe}_{0.2}\text{O}_{3-\delta}$ | N/A <sup>[a]</sup> | 480 | N/A | Angew. Chem. Int.<br>Ed. 2014, 53, 4582          |
| $\text{LaFeO}_{3-\delta}$                                                                                | 320                | 510 | 77  | Chem. Mater.<br>2016, 28, 1691                   |
| $\text{La}_{0.95}\text{FeO}_{3-\delta}$                                                                  | 320                | 400 | 48  | Chem. Mater.<br>2016, 28, 1691                   |
| Bulk $\text{LaCoO}_3$                                                                                    | 370                | 620 | 102 | Nat. Commun.<br>2016, 7, 11510                   |
| 80nm $\text{LaCoO}_3$                                                                                    | 330                | 490 | 69  | Nat. Commun.<br>2016, 7, 11510                   |
| $\text{SrCo}_{0.95}\text{P}_{0.05}\text{O}_{3-\delta}$                                                   | 360                | 480 | 84  | Adv. Funct.<br>Mater. 2016, 26,<br>5862          |
| $\text{SrCo}_{0.9}\text{Ti}_{0.1}\text{O}_{3-\delta}$                                                    | 320                | 510 | 88  | ACS Appl. Mater.<br>Interfaces 2015,<br>7, 17663 |
| $\text{SrNb}_{0.1}\text{Co}_{0.7}\text{Fe}_{0.2}\text{O}_{3-\delta}$ -BM                                 | 300                | 500 | 76  | Angew. Chem.<br>Int. Ed. 2015, 54,<br>3897       |
| $\text{SrNb}_{0.1}\text{Co}_{0.7}\text{Fe}_{0.2}\text{O}_{3-\delta}$ -Nanorod                            | 290                | 389 | 61  | Adv. Energy<br>Mater. 2017,<br>1602122           |

---

**Spinels-relative and hydroxides/oxyhydroxides catalysts**

| Catalysts                                                                                                  | Onset overpotential (mV) | Overpotential (mV) at 10 mA cm <sup>-2</sup> | Tafel slope (mV dec <sup>-1</sup> ) | Electrolyte (M KOH) | Ref.                                   |
|------------------------------------------------------------------------------------------------------------|--------------------------|----------------------------------------------|-------------------------------------|---------------------|----------------------------------------|
| Sr <sub>2</sub> Fe <sub>0.8</sub> Co <sub>0.2</sub> Mo <sub>0.65</sub> Ni <sub>0.35</sub> O <sub>6-δ</sub> | 190                      | 310                                          | 56                                  | 0.1                 | This work                              |
| Co <sub>3</sub> O <sub>4</sub>                                                                             | 270                      | 490                                          | 61                                  | 0.1                 | RSC Adv. 2015, 5, 27823                |
| Porous Co <sub>3</sub> O <sub>4</sub> nanoplates                                                           | 284                      | 523                                          | 71                                  | 1                   | J. Mater. Chem. A 2015, 3, 8107        |
| Co <sub>3</sub> O <sub>4</sub> /C nanowires                                                                | 240                      | 290                                          | 70                                  | 0.1                 | J. Am. Chem. Soc. 2014, 136, 13925     |
| Au-meso-Co <sub>3</sub> O <sub>4</sub>                                                                     | 300                      | 440                                          | 46                                  | 0.1                 | ChemSusChem 2014, 7, 82                |
| Zn <sub>x</sub> Co <sub>3-x</sub> O <sub>4</sub> nanowires                                                 | N/A                      | 320                                          | 51                                  | 0.1                 | Chem. Mater. 2014, 26, 1889            |
| Mn <sub>x</sub> Co <sub>3-x</sub> O <sub>4-δ</sub>                                                         | 290                      | 350                                          | 85                                  | 0.1                 | Chem. Eur. J. 2014, 20, 12669          |
| NiCo LDH nanosheets                                                                                        | 290                      | 420                                          | 113                                 | 0.1                 | J. Power Sources 2015, 278, 445        |
| NiCo LDH                                                                                                   | 230                      | N/A                                          | 101                                 | 0.1                 | Nano Lett. 2015, 15, 1421              |
| NiCoFe LDH nanoarray                                                                                       | 230                      | N/A                                          | 57                                  | 1                   | Nanoscale 2014, 6, 11789               |
| NiCo LDH/N-doped graphene                                                                                  | 250                      | N/A                                          | 614                                 | 0.1                 | Angew. Chem., Int. Ed. 2013, 52, 13567 |
| NiFe LDH                                                                                                   | 230                      | N/A                                          | 50                                  | 0.1                 | Chem. Commun. 2014, 50, 6479           |
| α-Ni(OH) <sub>2</sub>                                                                                      | 310                      | 331                                          | 42                                  | 0.1                 | J. Am. Chem. Soc. 2014, 136, 7077      |

[a]: N/A = Not available.
